# Supplementary material for: A microfabricated optofluidic ring resonator for sensitive, high-speed detection of volatile organic compounds
Source: Royal Society of Chemistry journal article supplement (doi:10.1039/c4lc00739e), 2014-01-01
Supplement: c4lc00739e1.pdf [file c4lc00739e1.pdf]

Electronic Supplementary Information for

## A Microfabricated Optofluidic Ring Resonator for Sensitive, High-Speed Detection of Volatile Organic Compounds

*Kee Scholten, Xudong Fan, and Edward T. Zellers\**

\*Address correspondence to [ezellers@umich.edu](mailto:ezellers@umich.edu)

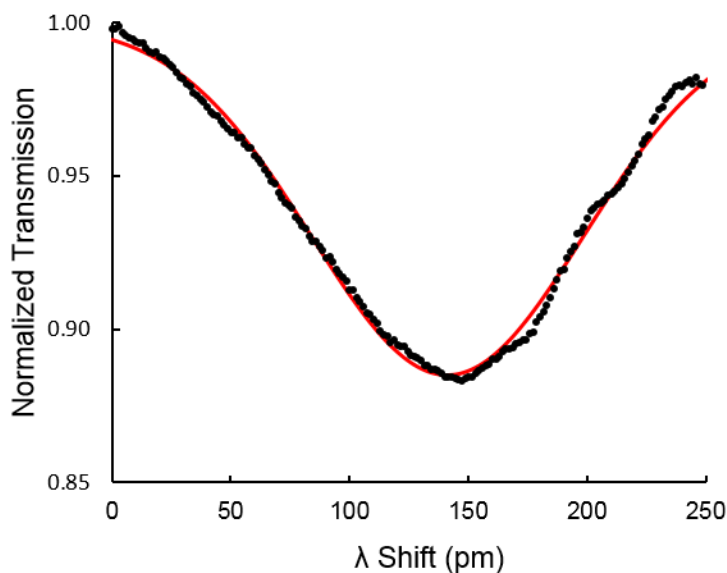

**Fig. S1** A normalized WGM resonance centered at 1550 nm generated in a PDMS coated  $\mu$ OFRR. Smooth (red) curve represents the fit of the data to a Lorentzian function. Q-Factor  $(\lambda_{\text{WGM}}/\text{FWHM}_{\text{WGM}}) = 11,500$ .

**Supplemental Video S1.**  $\mu$ OFRR WGM response to m-xylene. The normalized WGM resonance and the corresponding shift in  $\lambda_{\text{WGM}}$  in the  $\mu$ OFRR sensor during exposure to 4.3 ng of m-xylene is shown.
